# Supplementary material for: Variability in Cold Tolerance of Food and Clinical Listeria monocytogenes Isolates
Source: MDPI journal article supplement (doi:10.3390/microorganisms11010065), 2022-12-26
Supplement: s1 [file s1]

Supplementary Table S1. List of genes previously shown to be linked to cold tolerance in *L. Monocytogenes*.

| Gene name    | Aliases         | Function                                                                           | Temperature | Assay/Remark                                                                    | References |
|--------------|-----------------|------------------------------------------------------------------------------------|-------------|---------------------------------------------------------------------------------|------------|
| <i>OppA</i>  | <i>lmo2569</i>  | similar to dipeptide ABC transporter (dipeptide-binding protein)                   | 5°C         | A strain LO28 deletion mutant exhibited lower growth rate than wildtype (WT)    | [1]        |
| <i>gbuA</i>  | <i>lmo1014</i>  | highly similar to glycine betaine ABC transporter (ATP-binding protein)            | 4°C         | Deletion mutant exhibited lower growth rate against WT using 10403S strain.     | [2]        |
| <i>gbuB</i>  | <i>lmo1015</i>  | highly similar to glycine betaine ABC transporters (permease)                      | 4°C         | Deletion mutant exhibited lower growth rate against WT using 10403S strain.     | [2]        |
| <i>gbuC</i>  | <i>lmo1016</i>  | highly similar to glycinebetaine ABC transporters (permease)                       | 4°C         | Deletion mutant exhibited lower growth rate against WT using 10403S strain.     | [2]        |
| <i>betL</i>  | <i>lmo2092</i>  | glycine betaine transporter                                                        | 4°C         | Deletion mutant exhibited lower generation time against WT using 10403S strain. | [2]        |
| <i>OpuCA</i> | <i>lmo01428</i> | similar to glycine betaine/carnitine/choline ABC transporter (ATP-binding protein) | 4°C         | Deletion mutant exhibited lower generation time against WT using 10403S strain. | [2]        |
| <i>OpuCB</i> | <i>lmo01427</i> | similar to glycine betaine/carnitine/choline ABC transporter (membrane protein)    | 4°C         | Deletion mutant exhibited lower generation time against WT using 10403S strain. | [2]        |

|                    |                 |                                                                                                           |      |                                                                                       |     |
|--------------------|-----------------|-----------------------------------------------------------------------------------------------------------|------|---------------------------------------------------------------------------------------|-----|
| <i>OpuCC</i>       | <i>lmo01426</i> | similar to glycine<br>betaine/carnitine/choline<br>ABC transporter<br>(osmoprotectant-binding<br>protein) | 4°C  | Deletion mutant exhibited<br>lower generation time against<br>WT using 10403S strain. | [2] |
| <i>OpuCD</i>       | <i>lmo01425</i> | similar to<br>betaine/carnitine/choline<br>ABC transporter (membrane<br>p)                                | 4°C  | Deletion mutant exhibited<br>lower generation time against<br>WT using 10403S strain. | [2] |
| <i>flaA</i>        | <i>lmo00690</i> | flagellin protein                                                                                         | 10°C | The genes was expressed in<br>response to growth at low<br>temperature                | [3] |
| <i>fbP</i>         | <i>lmo00830</i> | highly similar to fructose-<br>1,6-bisphosphatase                                                         | 10°C | Genes expressed in response to<br>growth at low temperature                           | [3] |
| <i>orfX</i>        | <i>lmo0206</i>  | hypothetical protein                                                                                      | 3°C  | Deletion mutant exhibited<br>longer lag time then WT using<br>EGD strain              | [4] |
| <i>sigB</i>        | <i>lmo00895</i> | RNA polymerase sigma-37<br>factor (sigma-B)                                                               | 8°C  | Deletion mutant shown double<br>lag time compared to WT<br>using 10403S starin        | [5] |
| <i>rpoN (sigL)</i> | <i>lmo02461</i> | RNA polymerase sigma-54<br>factor (sigma-L)                                                               | 10°C | Genes Expressed in Response<br>to Growth at Low Temperature                           | [3] |
| <i>bglG</i>        | <i>lmo00501</i> | similar to transcription<br>antiterminator BglG family                                                    | 10°C | Genes Expressed in Response<br>to Growth at Low Temperature                           | [3] |

|                   |                 |                                                                                  |             |                                                                                  |     |
|-------------------|-----------------|----------------------------------------------------------------------------------|-------------|----------------------------------------------------------------------------------|-----|
| <i>hfq</i>        | <i>lmo01295</i> | similar to host factor-1 protein                                                 | 4°C         | Mutant strain displayed a slightly prolonged lag phase than WT using EGD strain. | [6] |
| <i>degU</i>       | <i>lmo02515</i> | similar to B. subtilis two-component response regulator                          | 25°C        | Transcriptional activator of <i>flaA</i> gene, in EGD strain                     | [7] |
| <i>yycJ</i>       | <i>lmo00291</i> | conserved hypothetical protein similar to <i>B. subtilis</i> <i>YycJ</i> protein | 10°C        | Genes expressed in response to growth at low temperature in 10403S strain        | [3] |
| <i>lhkA</i>       | <i>lmo1508</i>  | similar to two-component sensor histidine kinase                                 | 10°C        | Genes expressed in response to growth at low temperature in 10403S strain        | [3] |
| <i>psr</i>        | <i>lmo0443</i>  | similar to <i>B. subtilis</i> transcription regulator <i>LytR</i>                | 10°C        | Genes expressed in response to growth at low temperature in 10403S strain        | [3] |
| <i>cspL, cspA</i> | <i>lmo01364</i> | similar to cold shock protein                                                    | 4, and 10°C | Gene expressed in response to cold shock at 10 °C in LO28 strain                 | [8] |
| <i>cspD</i>       | <i>lmo01879</i> | similar to major cold-shock protein                                              | 4, and 10°C | Deletion mutant exhibited longer lag time then WT using EGDe strain              | [8] |
| <i>fri (flp)</i>  | <i>lmo0943</i>  | non-heme iron-binding ferritin                                                   | 10°C        | Genes expressed in response to grow at 10°C                                      | [3] |
| <i>trxB</i>       | <i>lmo2478</i>  | thioredoxin reductase                                                            | 10°C        | Genes expressed in response to grow at 10°C                                      | [3] |

|              |                |                                                                         |      |                                                                           |     |
|--------------|----------------|-------------------------------------------------------------------------|------|---------------------------------------------------------------------------|-----|
| <i>aroA</i>  | <i>lmo1600</i> | 3-deoxy-D-arabino-heptulosonate 7-phosphate synthase                    | 10°C | Genes expressed in response to grow at 10°C                               | [3] |
| <i>cysS</i>  | <i>lmo0239</i> | CysteinyI-tRNA synthetase                                               | 10°C | Genes expressed in response to grow at 10°C                               | [3] |
| <i>trpG</i>  | <i>lmo1632</i> | highly similar to anthranilate synthase beta subunit                    | 10°C | Genes expressed in response to grow at 10°C                               | [3] |
| <i>ltrA</i>  | <i>lmo0389</i> | low temperature requirement protein A                                   | 4°C  | Genes Expressed in Response to Growth at Low Temperature                  | [9] |
| <i>ltrB</i>  | <i>lmo0215</i> | low temperature requirement B protein                                   | 4°C  | Genes Expressed in Response to Growth at Low Temperature                  | [9] |
| <i>ltrC</i>  | <i>lom2398</i> | low temperature requirement C protein                                   | 4°C  | Genes Expressed in Response to Growth at Low Temperature                  | [9] |
| <i>groEL</i> | <i>lmo2068</i> | class I heat-shock protein (chaperonin) <i>GroEL</i>                    | 10°C | Multiple strains Genes Expressed in Response to Growth at Low Temperature | [3] |
| <i>clpP</i>  | <i>lmo2468</i> | ATP-dependent <i>Clp</i> protease proteolytic subunit                   | 10°C | Genes Expressed in Response to Growth at Low Temperature                  | [3] |
| <i>clpB</i>  | <i>lmo2206</i> | similar to endopeptidase <i>Clp</i> ATP-binding chain B ( <i>ClpB</i> ) | 10°C | Genes Expressed in Response to Growth at Low Temperature                  | [3] |

|             |                 |                                                                        |     |                                                                                  |      |
|-------------|-----------------|------------------------------------------------------------------------|-----|----------------------------------------------------------------------------------|------|
| <i>deaD</i> | <i>lmo0866</i>  | similar to ATP-dependent RNA helicase                                  | 3°C | Deletion mutant Vs wildtype EGDe No difference growth rate but shorten lag in WT | [10] |
| <i>deaD</i> | <i>lmo1450</i>  | similar to ATP-dependent RNA helicase, DEAD-box family ( <i>deaD</i> ) | 3°C | Deletion mutant Vs wildtype EGDe No difference growth rate but shorten lag in WT | [10] |
| <i>deaD</i> | <i>lmo1722</i>  | similar to ATP-dependent RNA helicase, DEAD-box family ( <i>deaD</i> ) | 3°C | Deletion mutant Vs wildtype EGDe No difference growth rate but shorten lag in WT | [10] |
| <i>pgpH</i> | <i>lmo1466</i>  | similar to unknown proteins                                            | 3°C | Genes Expressed in Response to Growth at Low Temperature                         | [11] |
| <i>yycG</i> | <i>lmo0288</i>  | Sensors (signal transduction)                                          | 3°C | Genes Expressed in Response to Growth at Low Temperature                         | [12] |
| <i>LisR</i> | <i>lmo01377</i> | two-component response regulator                                       | 3°C | Genes Expressed in Response to Growth at Low Temperature                         | [12] |
| <i>resE</i> | <i>lmo01947</i> | similar to two-component sensor histidine kinase ( <i>ResE</i> )       | 3°C | Deletion mutant Vs wildtype EGDe low growth rate than WT                         | [12] |
| <i>flhA</i> | <i>lmo0680</i>  | similar to flagella-associated protein <i>flhA</i>                     | 3°C | Deletion mutant Vs wildtype EGDe low growth rate than WT                         | [13] |

|             |                |                                                                          |     |                                                                |      |
|-------------|----------------|--------------------------------------------------------------------------|-----|----------------------------------------------------------------|------|
| <i>MotA</i> | <i>lmo0685</i> | similar to motility protein<br>(flagellar motor rotation)<br><i>MotA</i> | 3°C | Deletion mutant Vs wildtype<br>EGDe low growth rate than<br>WT | [13] |
|-------------|----------------|--------------------------------------------------------------------------|-----|----------------------------------------------------------------|------|

---

Supplementary Table S2. Isolate characteristics and phenotypic traits.

| ID     | Source      | CC    | Lineage | Serogroup | Plasmid | $\mu_{4C}$ | $\mu_{7C}$ | H_Cluster |
|--------|-------------|-------|---------|-----------|---------|------------|------------|-----------|
| Lm966  | Environment | CC220 | I       | 4b,4d,4e  | Absent  | 0.0123     | 0.0179     | Slow      |
| Lm974  | Environment | CC121 | II      | 1/2a,3a   | Present | 0.0134     | 0.0153     | Slow      |
| Lm976  | Mixed food  | CC20  | II      | 1/2a,3a   | Absent  | 0.0138     | 0.0241     | Fast      |
| Lm1055 | Environment | CC59  | I       | 1/2b,3b,7 | Absent  | 0.0110     | 0.0127     | Slow      |
| Lm1093 | Environment | CC59  | I       | 1/2b,3b,7 | Absent  | 0.0128     | 0.0176     | Slow      |
| Lm1095 | Environment | CC37  | II      | 1/2a,3a   | Absent  | 0.0149     | 0.0264     | Fast      |
| Lm1123 | Seafood     | CC121 | II      | 1/2a,3a   | Present | 0.0138     | 0.0227     | Fast      |
| Lm1203 | Environment | CC18  | II      | 1/2a,3a   | Absent  | 0.0148     | 0.0292     | Fast      |
| Lm1268 | Dairy       | CC224 | I       | 1/2b,3b,7 | Absent  | 0.0131     | 0.0125     | Slow      |
| Lm1304 | Environment | NOVEL | II      | 1/2a,3a   | Present | 0.0155     | 0.0212     | Fast      |
| Lm1306 | Environment | NOVEL | II      | 1/2a,3a   | Present | 0.0146     | 0.0243     | Fast      |
| Lm1309 | Environment | CC204 | II      | 1/2a,3a   | Present | 0.0144     | 0.0207     | Fast      |
| Lm1313 | Environment | CC121 | II      | 1/2a,3a   | Present | 0.0144     | 0.0227     | Fast      |
| Lm1321 | Environment | CC101 | II      | 1/2a,3a   | Present | 0.0118     | 0.0200     | Slow      |
| Lm1370 | Meat        | CC9   | II      | 1/2c,3c   | Absent  | 0.0155     | 0.0284     | Fast      |
| Lm1371 | Meat        | CC31  | II      | 1/2a,3a   | Present | 0.0118     | 0.0138     | Slow      |
| Lm1372 | Meat        | CC3   | I       | 1/2b,3b,7 | Present | 0.0140     | 0.0143     | Slow      |
| Lm1373 | Meat        | CC121 | II      | 1/2a,3a   | Present | 0.0128     | 0.0172     | Slow      |
| Lm1374 | Meat        | CC3   | I       | 1/2b,3b,7 | Present | 0.0140     | 0.0120     | Slow      |
| Lm1375 | Meat        | CC2   | I       | 4b,4d,4e  | Absent  | 0.0127     | 0.0178     | Slow      |
| Lm1376 | Meat        | CC3   | I       | 1/2b,3b,7 | Absent  | 0.0131     | 0.0161     | Slow      |
| Lm1377 | Meat        | CC2   | I       | 4b,4d,4e  | Absent  | 0.0130     | 0.0165     | Slow      |
| Lm1378 | Dairy       | CC5   | I       | 1/2b,3b,7 | Present | 0.0136     | 0.0175     | Slow      |
| Lm1379 | Dairy       | CC14  | II      | 1/2a,3a   | Absent  | 0.0146     | 0.0272     | Fast      |
| Lm1380 | Meat        | CC2   | I       | 4b,4d,4e  | Absent  | 0.0129     | 0.0178     | Slow      |
| Lm1381 | Meat        | CC2   | I       | 4b,4d,4e  | Absent  | 0.0112     | 0.0159     | Slow      |
| Lm1382 | Dairy       | CC4   | I       | 4b,4d,4e  | Absent  | 0.0142     | 0.0153     | Slow      |
| Lm1383 | Dairy       | CC412 | II      | 1/2a,3a   | Absent  | 0.0148     | 0.0212     | Fast      |
| Lm1384 | Seafood     | CC59  | I       | 1/2b,3b,7 | Absent  | 0.0112     | 0.0166     | Slow      |
| Lm1385 | Seafood     | CC155 | II      | 1/2a,3a   | Absent  | 0.0150     | 0.0259     | Fast      |
| Lm1386 | Seafood     | CC5   | I       | 1/2b,3b,7 | Present | 0.0135     | 0.0185     | Slow      |
| Lm1387 | Seafood     | CC2   | I       | 4b,4d,4e  | Absent  | 0.0157     | 0.0171     | Fast      |
| Lm1388 | Seafood     | CC2   | I       | 4b,4d,4e  | Absent  | 0.0130     | 0.0183     | Slow      |
| Lm1389 | Seafood     | CC31  | II      | 1/2a,3a   | Present | 0.0151     | 0.0168     | Fast      |
| Lm1390 | Dairy       | CC4   | I       | 4b,4d,4e  | Absent  | 0.0132     | 0.0133     | Slow      |
| Lm1391 | Dairy       | CC54  | I       | 4b,4d,4e  | Absent  | 0.0115     | 0.0125     | Slow      |
| Lm1392 | Seafood     | CC6   | I       | 4b,4d,4e  | Absent  | 0.0139     | 0.0134     | Slow      |
| Lm1393 | Meat        | CC2   | I       | 4b,4d,4e  | Absent  | 0.0142     | 0.0167     | Slow      |
| Lm1394 | Dairy       | CC26  | II      | 1/2a,3a   | Absent  | 0.0178     | 0.0224     | Fast      |
| Lm1403 | Seafood     | CC121 | II      | 1/2a,3a   | Present | 0.0156     | 0.0140     | Fast      |
| Lm1411 | Environment | CC1   | I       | 4b,4d,4e  | Absent  | 0.0127     | 0.0137     | Slow      |
| Lm1413 | Environment | CC2   | I       | 4b,4d,4e  | Absent  | 0.0127     | 0.0117     | Slow      |
| Lm1423 | Environment | CC121 | II      | 1/2a,3a   | Present | 0.0129     | 0.0100     | Slow      |
| Lm1427 | Environment | NOVEL | II      | 1/2a,3a   | Present | 0.0152     | 0.0179     | Fast      |
| Lm1428 | Environment | NOVEL | II      | 1/2a,3a   | Present | 0.0162     | 0.0201     | Fast      |
| Lm1439 | Seafood     | CC121 | II      | 1/2a,3a   | Present | 0.0125     | 0.0125     | Slow      |
| Lm1441 | Environment | CC5   | I       | 1/2b,3b,7 | Present | 0.0117     | 0.0127     | Slow      |

|            |             |       |    |           |         |        |        |      |
|------------|-------------|-------|----|-----------|---------|--------|--------|------|
| Lm1445     | Meat        | CC7   | II | 1/2a,3a   | Absent  | 0.0121 | 0.0135 | Slow |
| Lm1502     | Environment | NOVEL | II | 1/2a,3a   | Absent  | 0.0160 | 0.0189 | Fast |
| Lm1507     | Environment | NOVEL | II | 1/2a,3a   | Absent  | 0.0141 | 0.0192 | Fast |
| Lm1513     | Seafood     | CC121 | II | 1/2a,3a   | Present | 0.0137 | 0.0162 | Slow |
| Lm1515     | Environment | CC18  | II | 1/2a,3a   | Absent  | 0.0155 | 0.0210 | Fast |
| Lm1519     | Seafood     | CC121 | II | 1/2a,3a   | Present | 0.0126 | 0.0181 | Slow |
| Lm1527     | Environment | CC37  | II | 1/2a,3a   | Absent  | 0.0148 | 0.0226 | Fast |
| Lm1534     | Meat        | CC6   | I  | 4b,4d,4e  | Absent  | 0.0121 | 0.0162 | Slow |
| Lm1564     | Environment | CC2   | I  | 4b,4d,4e  | Absent  | 0.0132 | 0.0150 | Slow |
| Lm1679     | Environment | CC204 | II | 1/2a,3a   | Absent  | 0.0163 | 0.0183 | Fast |
| Lm1798     | Dairy       | CC18  | II | 1/2a,3a   | Absent  | 0.0152 | 0.0207 | Fast |
| Lm1880     | Vegetable   | CC8   | II | 1/2a,3a   | Present | 0.0137 | 0.0222 | Fast |
| Lm1976     | Environment | CC8   | II | 1/2a,3a   | Present | 0.0147 | 0.0275 | Fast |
| Lm1989     | Seafood     | CC121 | II | 1/2a,3a   | Present | 0.0126 | 0.0197 | Slow |
| Lm1991     | Seafood     | CC121 | II | 1/2a,3a   | Present | 0.0125 | 0.0168 | Slow |
| Lm2075     | Environment | CC14  | II | 1/2a,3a   | Absent  | 0.0148 | 0.0254 | Fast |
| Lm2095     | Environment | CC54  | I  | 4b,4d,4e  | Absent  | 0.0057 | 0.0107 | Slow |
| Lm2105     | Environment | CC54  | I  | 4b,4d,4e  | Absent  | 0.0120 | 0.0128 | Slow |
| Lm2113     | Environment | CC1   | I  | 4b,4d,4e  | Absent  | 0.0123 | 0.0102 | Slow |
| Lm2181     | Environment | CC220 | I  | 4b,4d,4e  | Absent  | 0.0113 | 0.0127 | Slow |
| Lm2183     | Environment | CC2   | I  | 4b,4d,4e  | Absent  | 0.0153 | 0.0155 | Fast |
| Lm2185     | Environment | CC14  | II | 1/2a,3a   | Absent  | 0.0165 | 0.0194 | Fast |
| Lm2226     | Environment | CC220 | I  | 4b,4d,4e  | Absent  | 0.0166 | 0.0139 | Fast |
| Lm2234     | Environment | CC220 | I  | 4b,4d,4e  | Absent  | 0.0147 | 0.0145 | Fast |
| Lm2237     | Environment | CC2   | I  | 4b,4d,4e  | Absent  | 0.0079 | 0.0185 | Slow |
| Lm2240     | Environment | CC59  | I  | 1/2b,3b,7 | Absent  | 0.0134 | 0.0127 | Slow |
| Lm2241     | Environment | CC59  | I  | 1/2b,3b,7 | Absent  | 0.0143 | 0.0150 | Slow |
| Lm2256     | Environment | CC121 | II | 1/2a,3a   | Absent  | 0.0192 | 0.0258 | Fast |
| Lm2259     | Environment | CC54  | I  | 4b,4d,4e  | Absent  | 0.0125 | 0.0166 | Slow |
| Lm2294     | Environment | CC8   | II | 1/2a,3a   | Present | 0.0153 | 0.0217 | Fast |
| Lm2298     | Environment | CC379 | I  | 1/2b,3b,7 | Absent  | 0.0132 | 0.0153 | Slow |
| Lm2507     | Environment | CC220 | I  | 4b,4d,4e  | Absent  | 0.0133 | 0.0135 | Slow |
| Lm3442     | Vegetable   | CC87  | I  | 1/2b,3b,7 | Absent  | 0.0114 | 0.0134 | Slow |
| Lm3443     | Vegetable   | CC18  | II | 1/2a,3a   | Absent  | 0.0174 | 0.0196 | Fast |
| Lm3444     | Vegetable   | CC1   | I  | 4b,4d,4e  | Absent  | 0.0134 | 0.0124 | Slow |
| Lm3445     | Vegetable   | CC54  | I  | 4b,4d,4e  | Absent  | 0.0124 | 0.0129 | Slow |
| Lm3446     | Vegetable   | CC54  | I  | 4b,4d,4e  | Absent  | 0.0129 | 0.0168 | Slow |
| Lm3447     | Vegetable   | CC59  | I  | 1/2b,3b,7 | Absent  | 0.0139 | 0.0130 | Slow |
| Lm3448     | Vegetable   | CC18  | II | 1/2a,3a   | Absent  | 0.0183 | 0.0212 | Fast |
| Lm6179     | Dairy       | CC121 | II | 1/2c,3c   | Present | 0.0165 | 0.0174 | Fast |
| Lm10403S   | Clinical    | CC7   | II | 1/2a,3a   | Absent  | 0.0148 | 0.0171 | Fast |
| Lm1513C    | Environment | NOVEL | II | 1/2a,3a   | Absent  | 0.0120 | 0.0197 | Slow |
| LmEGD-e    | Clinical    | CC9   | II | 1/2c,3c   | Absent  | 0.0168 | 0.0199 | Fast |
| LmF1109-17 | Environment | CC121 | II | 1/2a,3a   | Present | 0.0084 | 0.0105 | Slow |
| LmF111-17  | Mixed food  | CC121 | II | 1/2a,3a   | Present | 0.0140 | 0.0156 | Slow |
| LmF112-17  | Mixed food  | CC121 | II | 1/2a,3a   | Present | 0.0137 | 0.0141 | Slow |
| LmF114-17  | Mixed food  | CC121 | II | 1/2a,3a   | Present | 0.0157 | 0.0174 | Fast |
| LmF1209-16 | Environment | CC121 | II | 1/2a,3a   | Present | 0.0133 | 0.0141 | Slow |
| LmF1221-16 | Meat        | CC121 | II | 1/2a,3a   | Present | 0.0123 | 0.0150 | Slow |
| LmF1230-16 | Meat        | CC121 | II | 1/2a,3a   | Present | 0.0139 | 0.0120 | Slow |



|            |             |       |    |           |         |        |        |      |
|------------|-------------|-------|----|-----------|---------|--------|--------|------|
| LmF1524-16 | Environment | CC5   | 1  | 1/2b,3b,7 | Present | 0.0130 | 0.0102 | Slow |
| LmF1644-17 | Environment | CC5   | 1  | 1/2b,3b,7 | Present | 0.0106 | 0.0152 | Slow |
| LmF1646-17 | Environment | CC121 | 11 | 1/2a,3a   | Present | 0.0134 | 0.0147 | Slow |
| LmF168-17  | Environment | CC121 | 11 | 1/2a,3a   | Present | 0.0131 | 0.0118 | Slow |
| LmF1857-15 | Environment | CC5   | 1  | 1/2b,3b,7 | Present | 0.0117 | 0.0134 | Slow |
| LmF1994-15 | Meat        | CC220 | 1  | 4b,4d,4e  | Absent  | 0.0119 | 0.0132 | Slow |
| LmF2151-17 | Meat        | CC121 | 11 | 1/2a,3a   | Present | 0.0125 | 0.0133 | Slow |
| LmF2152-17 | Meat        | CC121 | 11 | 1/2a,3a   | Present | 0.0127 | 0.0105 | Slow |
| LmF2153-17 | Meat        | CC121 | 11 | 1/2a,3a   | Present | 0.0125 | 0.0123 | Slow |
| LmF2154-17 | Meat        | CC121 | 11 | 1/2a,3a   | Present | 0.0121 | 0.0192 | Slow |
| LmF2155-17 | Meat        | CC121 | 11 | 1/2a,3a   | Present | 0.0124 | 0.0125 | Slow |
| LmF2160-17 | Meat        | CC121 | 11 | 1/2a,3a   | Present | 0.0125 | 0.0146 | Slow |
| LmF2161-17 | Environment | CC121 | 11 | 1/2a,3a   | Absent  | 0.0132 | 0.0125 | Slow |
| LmF2165-17 | Environment | CC121 | 11 | 1/2a,3a   | Present | 0.0081 | 0.0113 | Slow |
| LmF2166-17 | Environment | CC5   | 1  | 1/2b,3b,7 | Present | 0.0100 | 0.0137 | Slow |
| LmF2170-17 | Environment | CC121 | 11 | 1/2a,3a   | Present | 0.0080 | 0.0213 | Slow |
| LmF2176-17 | Environment | CC5   | 1  | 1/2b,3b,7 | Present | 0.0108 | 0.0156 | Slow |
| LmF2299-15 | Environment | CC5   | 1  | 1/2b,3b,7 | Present | 0.0095 | 0.0135 | Slow |
| LmF2365    | Dairy       | CC1   | 1  | 4b,4d,4e  | Absent  | 0.0122 | 0.0132 | Slow |
| LmF340-17  | Environment | CC121 | 11 | 1/2a,3a   | Present | 0.0118 | 0.0146 | Slow |
| LmF345-17  | Environment | CC121 | 11 | 1/2a,3a   | Present | 0.0117 | 0.0136 | Slow |
| LmF347-16  | Environment | CC5   | 1  | 1/2b,3b,7 | Present | 0.0173 | 0.0165 | Fast |
| LmF347-17  | Environment | CC121 | 11 | 1/2a,3a   | Present | 0.0115 | 0.0146 | Slow |
| LmF348-17  | Environment | CC121 | 11 | 1/2a,3a   | Present | 0.0111 | 0.0120 | Slow |
| LmF365-16  | Meat        | CC121 | 11 | 1/2a,3a   | Present | 0.0117 | 0.0146 | Slow |
| LmF671-16  | Environment | CC5   | 1  | 1/2b,3b,7 | Present | 0.0100 | 0.0149 | Slow |
| LmF742-17  | Environment | CC5   | 1  | 1/2b,3b,7 | Present | 0.0110 | 0.0134 | Slow |
| LmF991-16  | Environment | CC5   | 1  | 1/2b,3b,7 | Present | 0.0136 | 0.0136 | Slow |
| LmMQ130026 | Clinical    | CC1   | 1  | 4b        | Absent  | 0.0125 | 0.0151 | Slow |
| LmMQ130029 | Clinical    | CC1   | 1  | 4b        | Absent  | 0.0123 | 0.0151 | Slow |
| LmMQ130032 | Clinical    | CC1   | 1  | 4b        | Absent  | 0.0148 | 0.0160 | Fast |
| LmMQ130033 | Clinical    | CC54  | 1  | 4b        | Absent  | 0.0159 | 0.0179 | Fast |
| LmMQ130037 | Clinical    | CC18  | 11 | 1/2a      | Present | 0.0148 | 0.0237 | Fast |
| LmMQ130042 | Clinical    | CC1   | 1  | 4b        | Absent  | 0.0118 | 0.0156 | Slow |
| LmMQ130058 | Clinical    | CC6   | 1  | 4b        | Absent  | 0.0139 | 0.0136 | Slow |
| LmMQ140011 | Clinical    | CC101 | 11 | 1/2a      | Absent  | 0.0141 | 0.0272 | Fast |
| LmMQ140012 | Clinical    | CC101 | 11 | 1/2a      | Absent  | 0.0143 | 0.0261 | Fast |
| LmMQ140025 | Clinical    | CC1   | 1  | 4b        | Absent  | 0.0134 | 0.0206 | Slow |
| LmMQ140029 | Clinical    | CC7   | 11 | 1/2a      | Absent  | 0.0142 | 0.0211 | Fast |
| LmMQ140030 | Clinical    | CC4   | 1  | 4b        | Absent  | 0.0081 | 0.0171 | Slow |
| LmMQ140031 | Clinical    | CC1   | 1  | 4b        | Absent  | 0.0104 | 0.0162 | Slow |
| LmMQ140032 | Clinical    | CC90  | 11 | 1/2a      | Absent  | 0.0140 | 0.0237 | Fast |
| LmMQ140033 | Clinical    | CC1   | 1  | 4b        | Absent  | 0.0144 | 0.0269 | Fast |
| LmMQ140034 | Clinical    | CC121 | 11 | 1/2a      | Absent  | 0.0139 | 0.0206 | Fast |
| LmMQ140035 | Clinical    | CC121 | 11 | 1/2a      | Absent  | 0.0079 | 0.0184 | Slow |
| LmMQ150001 | Clinical    | CC37  | 11 | 1/2a      | Absent  | 0.0146 | 0.0235 | Fast |
| LmMQ150004 | Clinical    | CC54  | 1  | 4b        | Absent  | 0.0123 | 0.0159 | Slow |
| LmMQ150005 | Clinical    | CC6   | 1  | 4b        | Absent  | 0.0123 | 0.0145 | Slow |
| LmMQ150007 | Clinical    | CC101 | 11 | 1/2a      | Absent  | 0.0125 | 0.0202 | Slow |
| LmMQ150008 | Clinical    | CC101 | 11 | 1/2a      | Present | 0.0119 | 0.0205 | Slow |

|            |          |      |    |      |         |        |        |      |
|------------|----------|------|----|------|---------|--------|--------|------|
| LmMQ150011 | Clinical | CC20 | II | 1/2a | Present | 0.0129 | 0.0211 | Slow |
| LmMQ150012 | Clinical | CC6  | I  | 4b   | Absent  | 0.0119 | 0.0157 | Slow |
| LmMQ150013 | Clinical | CC2  | I  | 4b   | Absent  | 0.0140 | 0.0164 | Slow |

Supplementary Figure S1. Rapid Alert System for Food and Feed (RASFF) food notifications in the EU for *L. Monocytogenes* from September 2020-March 2022 (available at <https://webgate.ec.europa.eu/rasff-window/screen/search>).

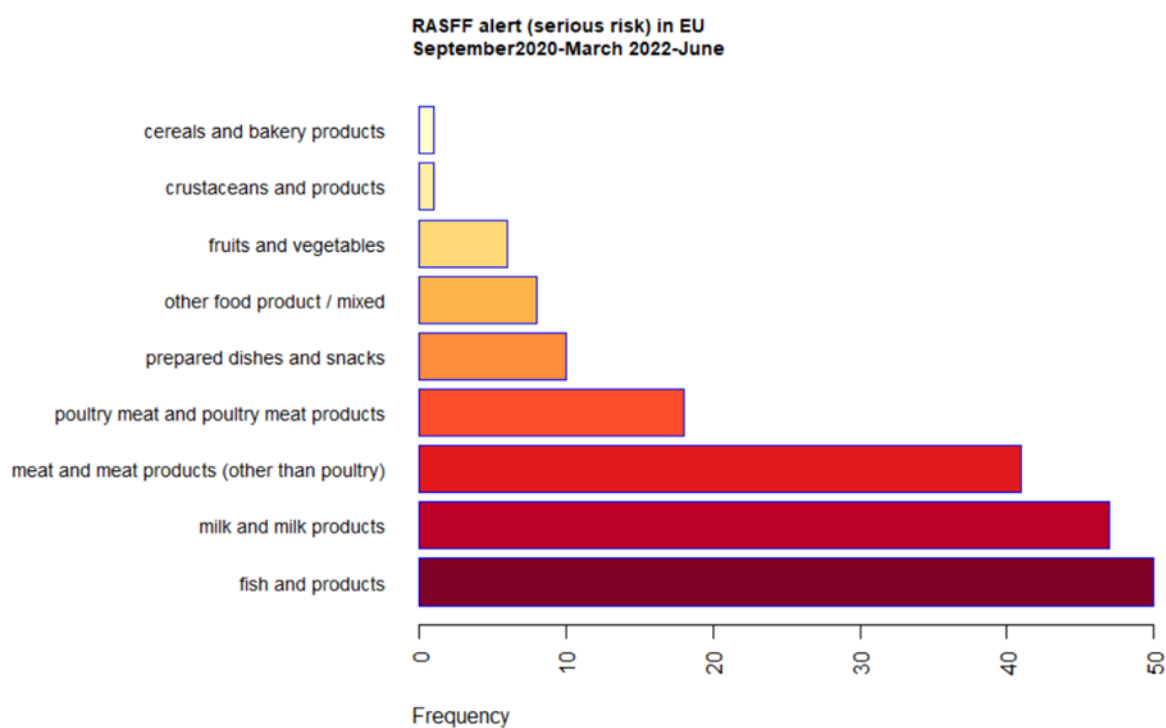

## References

- [1] Borezee, E.; Pellegrini, E.; Berche, P. OppA of *Listeria Monocytogenes*, an Oligopeptide-Binding Protein Required for Bacterial Growth at Low Temperature and Involved in Intracellular Survival. *Infect. Immun.*, **2000**, 68 (12), 7069–7077. <https://doi.org/10.1128/IAI.68.12.7069-7077.2000>.
- [2] Angelidis, A. S.; Smith, G. M. Role of the Glycine Betaine and Carnitine Transporters in Adaptation of *Listeria Monocytogenes* to Chill Stress in Defined Medium. *Appl. Environ. Microbiol.*, **2003**, 69 (12), 7492–7498. <https://doi.org/10.1128/AEM.69.12.7492-7498.2003>.
- [3] Liu, S.; Graham, J. E.; Bigelow, L.; Morse, P. D.; Wilkinson, B. J. Identification of *Listeria Monocytogenes* Genes Expressed in Response to Growth at Low Temperature. *Appl. Environ. Microbiol.*, **2002**, 68 (4), 1697–1705. <https://doi.org/10.1128/AEM.68.4.1697-1705.2002>.
- [4] Brøndsted, L.; Kallipolitis, B. H.; Ingmer, H.; Knöchel, S. KdpE and a Putative RsbQ Homologue Contribute to Growth of *Listeria Monocytogenes* at High Osmolarity and Low Temperature. *FEMS Microbiol. Lett.*, **2003**, 219 (2), 233–239. [https://doi.org/10.1016/S0378-1097\(03\)00052-1](https://doi.org/10.1016/S0378-1097(03)00052-1).
- [5] Becker, L. A.; Evans, S. N.; Hutkins, R. W.; Benson, A. K. Role of  $\Sigma$ B in Adaptation of *Listeria Monocytogenes* to Growth at Low Temperature. *J. Bacteriol.*, **2000**, 182 (24), 7083–7087. <https://doi.org/10.1128/JB.182.24.7083-7087.2000>.
- [6] Christiansen, J. K.; Larsen, M. H.; Ingmer, H.; Søgaaard-Andersen, L.; Kallipolitis, B. H. The RNA-Binding Protein Hfq of *Listeria Monocytogenes*: Role in Stress Tolerance and Virulence. *J. Bacteriol.*, **2004**, 186 (11), 3355–3362. <https://doi.org/10.1128/JB.186.11.3355-3362.2004>.
- [7] Knudsen, G. M.; Olsen, J. E.; Dons, L. Characterization of DegU, a Response Regulator in *Listeria Monocytogenes*, Involved in Regulation of Motility and Contributes to Virulence. *FEMS Microbiol. Lett.*, **2004**, 240 (2), 171–179. <https://doi.org/10.1016/j.femsle.2004.09.039>.
- [8] Schmid, B.; Klumpp, J.; Raimann, E.; Loessner, M. J.; Stephan, R.; Tasara, T. Role of Cold Shock Proteins in Growth of *Listeria Monocytogenes* under Cold and Osmotic Stress Conditions. *Appl. Environ. Microbiol.*, **2009**, 75 (6), 1621–1627. <https://doi.org/10.1128/AEM.02154-08>.
- [9] Zheng, W.; Kathariou, S. Differentiation of Epidemic-Associated Strains of *Listeria Monocytogenes* by Restriction Fragment Length Polymorphism in a Gene Region Essential for Growth at Low Temperatures (4°C). *Appl. Environ. Microbiol.*, **1995**, 61 (12), 4310–4314. <https://doi.org/10.1128/aem.61.12.4310-4314.1995>.
- [10] Markkula, A.; Mattila, M.; Lindström, M.; Korkeala, H. Genes Encoding Putative DEAD-Box RNA Helicases in *Listeria Monocytogenes* EGD-e Are Needed for Growth and Motility at 3°C. *Environ. Microbiol.*, **2012**, 14 (8), 2223–2232. <https://doi.org/10.1111/j.1462-2920.2012.02761.x>.
- [11] Arguedas-Villa, C.; Stephan, R.; Tasara, T. Evaluation of Cold Growth and Related Gene Transcription Responses Associated with *Listeria Monocytogenes* Strains of Different Origins. *Food Microbiol.*, **2010**, 27 (5), 653–660. <https://doi.org/10.1016/j.fm.2010.02.009>.

- [12] Pöntinen, A.; Markkula, A.; Lindström, M.; Korkeala, H. Two-Component-System Histidine Kinases Involved in Growth of *Listeria Monocytogenes* EGD-e at Low Temperatures. *Appl. Environ. Microbiol.*, **2015**, *81* (12), 3994–4004. <https://doi.org/10.1128/AEM.00626-15>.
- [13] Mattila, M.; Lindström, M.; Somervuo, P.; Markkula, A.; Korkeala, H. Role of FlhA and MotA in Growth of *Listeria Monocytogenes* at Low Temperatures. *Int. J. Food Microbiol.*, **2011**, *148* (3), 177–183. <https://doi.org/10.1016/j.ijfoodmicro.2011.05.022>.
